# Supplementary material for: Synthesis and antimicrobial activity of aminoglycoside-conjugated silica nanoparticles against clinical and resistant bacteria
Source: Royal Society of Chemistry journal article supplement (doi:10.1039/c5nj00007f), 2015-01-01
Supplement: c5nj00007f1.pdf [file c5nj00007f1.pdf]

## ELECTRONIC SUPPLEMENTARY INFORMATION

### Synthesis and Antimicrobial Activity of Aminoglycoside-Conjugated Silica Nanoparticles on Clinical and Resistant Bacteria

Shrish Agnihotri,<sup>a,c</sup> Rajiv Pathak,<sup>b</sup> Diksha Jha,<sup>b</sup> Indrajit Roy,<sup>c</sup> Hemant K. Gautam,<sup>b</sup> Ashwani K. Sharma<sup>a</sup> and Pradeep Kumar<sup>\*a</sup>

<sup>a</sup> Nucleic Acids Research laboratory, CSIR-Institute of Genomics and Integrative Biology, Mall Road, Delhi-110007, India

<sup>b</sup> Microbial Biotechnology Laboratory, CSIR-Institute of Genomics and Integrative Biology, Sukhdev Vihar, Mathura Road, New Delhi-110025, India

<sup>c</sup> Department of Chemistry, University of Delhi, Delhi-110007, India

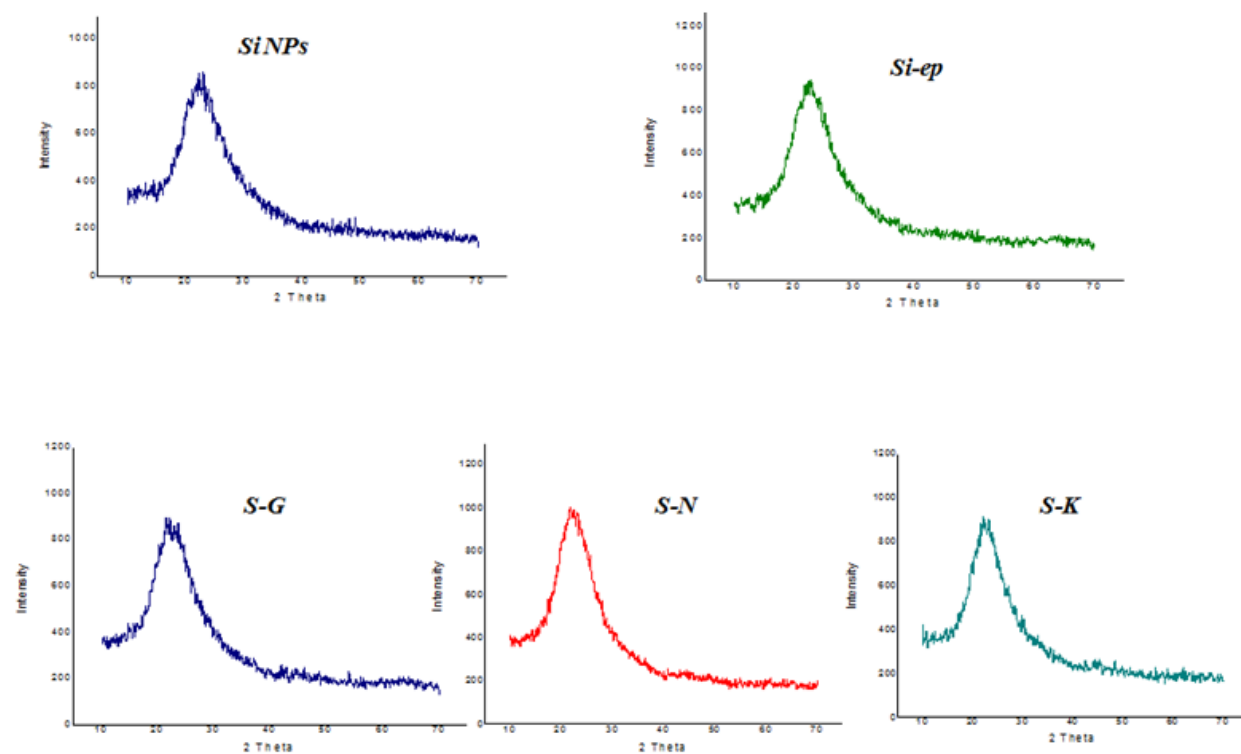

**Figure S1.** XRD spectra of native and modified silica nanoparticles.

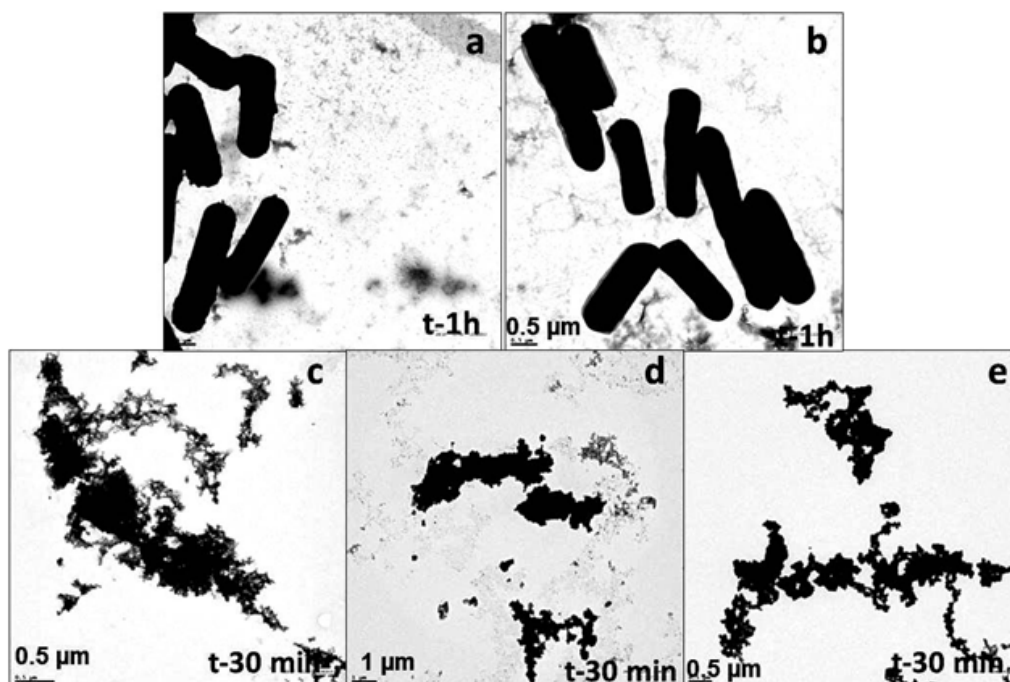

**Figure S2.** TEM images of *Bacillus cereus* (BC) (a) untreated, (b) treated with native silica nanoparticles (Si-NPs) at concentration of 2000 μg/ml for 1 h, (c) treated with silica-gentamicin (S-G) at concentration of 350 μg/ml (5x MIC) for 30 min, (d) treated with silica-kanamycin (S-K) at concentration of 1900 μg/ml (5x MIC) for 30 min, and (e) treated with silica-neomycin (S-N) at concentration of 400 μg/ml (5x MIC) for 30 min.
